# Supplementary material for: Multiclass Determination of Endocrine-Disrupting Chemicals in Meconium: First Evidence of Perfluoroalkyl Substances in This Biological Compartment
Source: MDPI journal article supplement (doi:10.3390/toxics12010075), 2024-01-15
Supplement: s1 [file s1]

**Table S2.** Experimental domain and design matrix for diagnosis of DLLME factors.

| Factor                     | Level |      |
|----------------------------|-------|------|
|                            | Low   | High |
| pH of aqueous solution     | 2     | 5    |
| % NaCl of aqueous solution | 2     | 10   |
| Volume of TCM (mL)         | 0.5   | 1.5  |
| Extraction time (s)        | 20    | 60   |

| Design matrix point | pH of aqueous solution | % NaCl of aqueous solution | Volume of TCM (mL) | Extraction time (s) |
|---------------------|------------------------|----------------------------|--------------------|---------------------|
| 1                   | 2                      | 2                          | 0.5                | 20                  |
| 2                   | 5                      | 2                          | 0.5                | 60                  |
| 3                   | 2                      | 10                         | 0.5                | 60                  |
| 4                   | 5                      | 10                         | 0.5                | 20                  |
| 5                   | 2                      | 2                          | 1.5                | 60                  |
| 6                   | 5                      | 2                          | 1.5                | 20                  |
| 7                   | 2                      | 10                         | 1.5                | 20                  |
| 8                   | 5                      | 10                         | 1.5                | 60                  |
| 9                   | 3.5                    | 6                          | 1                  | 40                  |
| 10                  | 3.5                    | 6                          | 1                  | 40                  |
| 11                  | 3.5                    | 6                          | 1                  | 40                  |
| 12                  | 3.5                    | 6                          | 1                  | 40                  |
| 13                  | 3.5                    | 6                          | 1                  | 40                  |
| 14                  | 3.5                    | 6                          | 1                  | 40                  |
