# Supplementary material for: Multiclass Determination of Endocrine-Disrupting Chemicals in Meconium: First Evidence of Perfluoroalkyl Substances in This Biological Compartment
Source: MDPI journal article supplement (doi:10.3390/toxics12010075), 2024-01-15
Supplement: s1 [file s1]

## Supplementary Materials

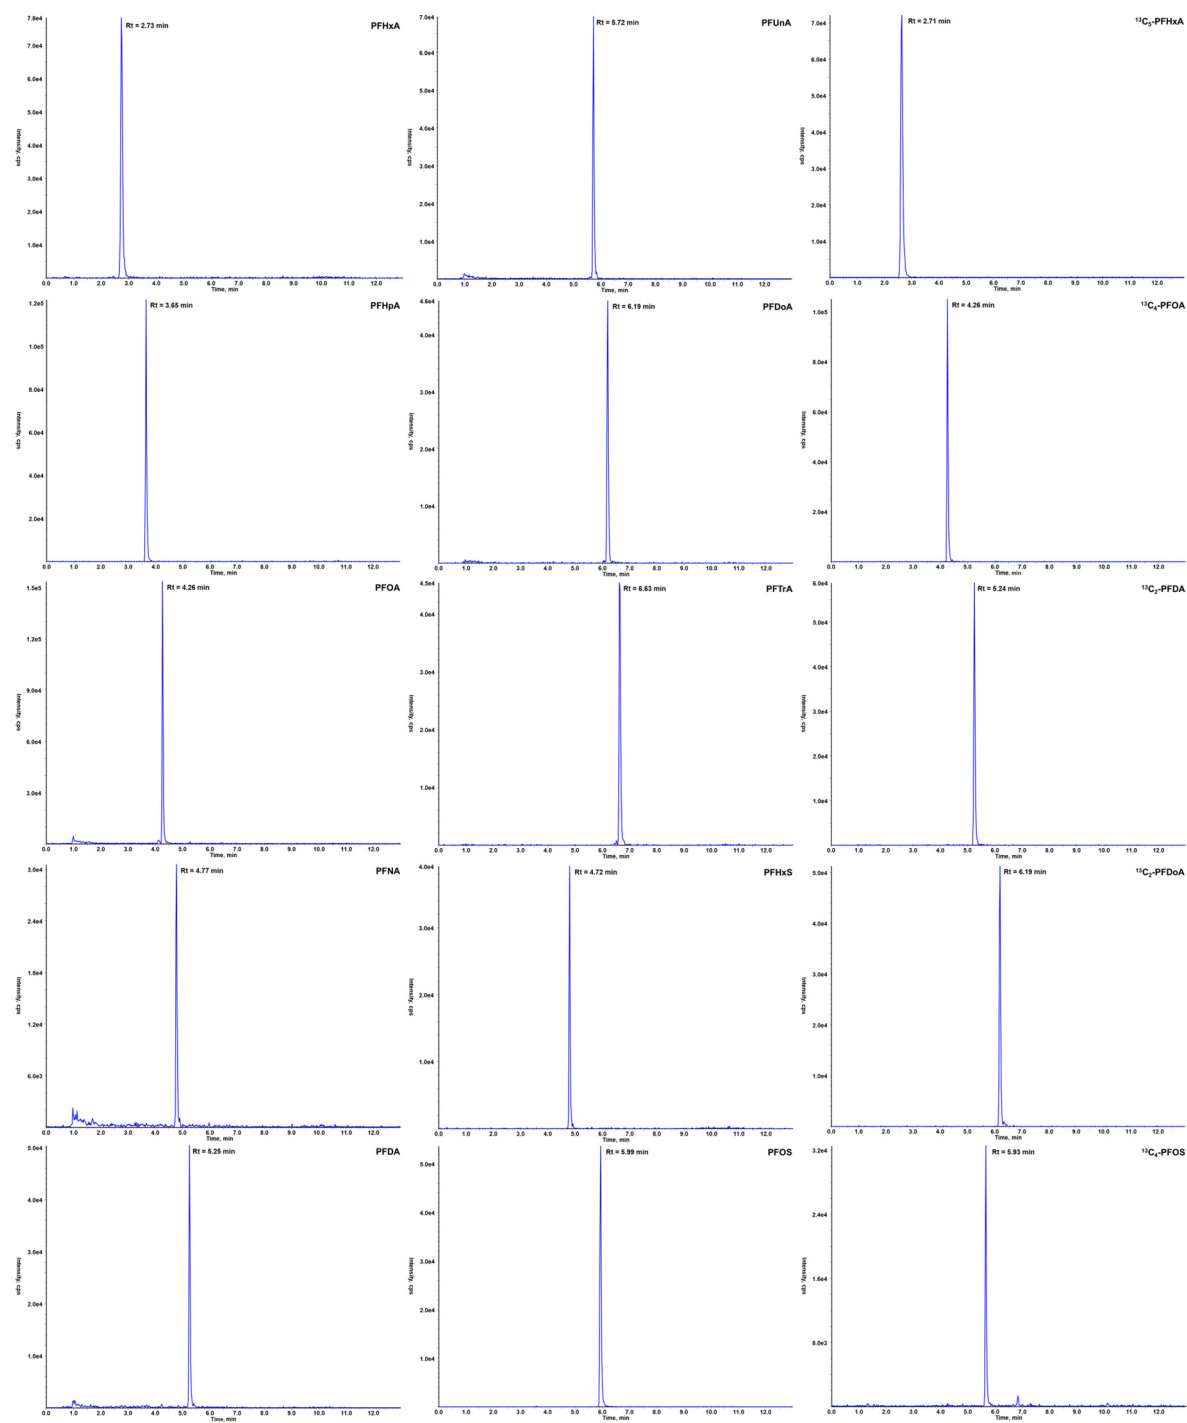

**Figure S1.** Chromatograms obtained from blank pool meconium spiked at 0.5 ng g<sup>-1</sup> with PFAS.

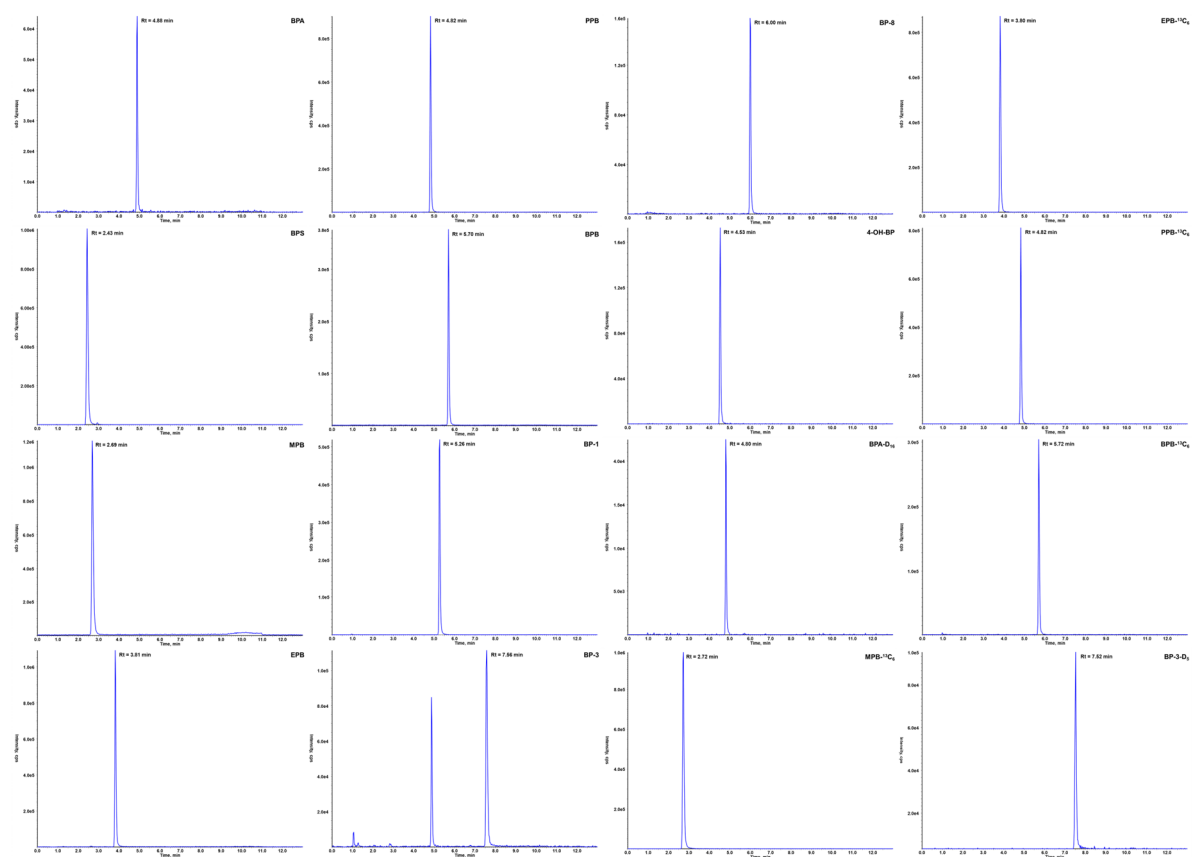

**Figure S2.** Chromatograms obtained from blank pool meconium spiked at 10.0 ng g<sup>-1</sup> with bisphenols, parabens, and benzophenones.

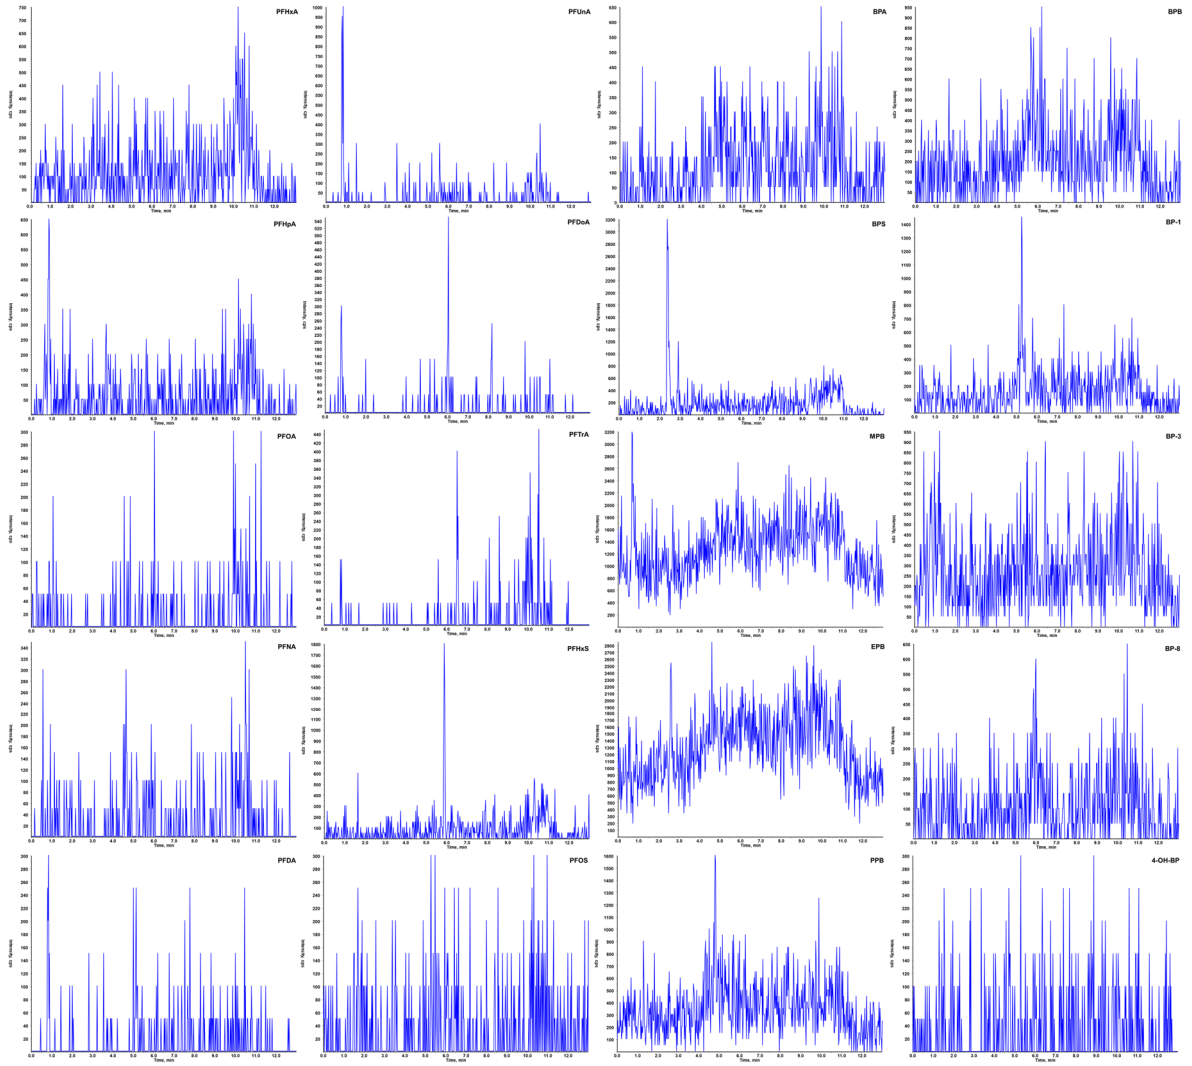

Figure S3. Procedural blank obtained from milliQ water.
