# Supplementary material for: Multiclass Determination of Endocrine-Disrupting Chemicals in Meconium: First Evidence of Perfluoroalkyl Substances in This Biological Compartment
Source: MDPI journal article supplement (doi:10.3390/toxics12010075), 2024-01-15
Supplement: s1 [file s1]

**Table S1.** Experimental domain and design matrix for SALLE optimization.

| Factor                                  | Level |      |
|-----------------------------------------|-------|------|
|                                         | Low   | High |
| Mass of NaCl (mg)                       | 200   | 1000 |
| Volume of formic acid ( $\mu\text{L}$ ) | 4     | 40   |
| Manual shaking time (s)                 | 20    | 60   |

| Design matrix point | Mass of NaCl (mg) | Volume of formic acid ( $\mu\text{L}$ ) | Manual shaking time (s) |
|---------------------|-------------------|-----------------------------------------|-------------------------|
| 1                   | 320               | 12.5                                    | 28                      |
| 2                   | 600               | 12.5                                    | 28                      |
| 3                   | 320               | 31.5                                    | 28                      |
| 4                   | 600               | 31.5                                    | 28                      |
| 5                   | 320               | 12.5                                    | 52                      |
| 6                   | 600               | 12.5                                    | 52                      |
| 7                   | 320               | 31.5                                    | 52                      |
| 8                   | 600               | 31.5                                    | 52                      |
| 9                   | 200               | 22                                      | 40                      |
| 10                  | 1000              | 22                                      | 40                      |
| 11                  | 460               | 4                                       | 40                      |
| 12                  | 460               | 40                                      | 40                      |
| 13                  | 460               | 22                                      | 20                      |
| 14                  | 460               | 22                                      | 60                      |
| 15                  | 460               | 22                                      | 40                      |
| 16                  | 460               | 22                                      | 40                      |
| 17                  | 460               | 22                                      | 40                      |
| 18                  | 460               | 22                                      | 40                      |
| 19                  | 460               | 22                                      | 40                      |
| 20                  | 460               | 22                                      | 40                      |
